# Supplementary material
Source: Royal Society of Chemistry journal article supplement (doi:10.1039/d6nr00765a)
Supplement: d6nr00765a1.pdf [file d6nr00765a1.pdf]

## Supporting Information

### Atomically Dispersed Tin in Cuprous Oxide for Enhancing \*CO Coverage to Selectively Electroreduce CO<sub>2</sub> toward C<sub>2</sub> Products

Shuai Wang <sup>a</sup>, Chang Liu <sup>a</sup>, Yue Qin <sup>a</sup>, Zepu Chen <sup>a</sup> and Qingfa Wang<sup>a,b,\*</sup>

<sup>a</sup> Key Laboratory for Green Chemical Technology of the Ministry of Education, School of Chemical Engineering and Technology, Tianjin University, Tianjin 300072, China.

<sup>b</sup> Collaborative Innovation Center of Chemical Science and Engineering (Tianjin), Tianjin University, Tianjin 300072, China.

\*Corresponding author. Tel & Fax: +86-22-27892340, Email: [qfwang@tju.edu.cn](mailto:qfwang@tju.edu.cn) (Q. Wang)

---

\* Corresponding Author. Tel & Fax: +86-22-27892340, Email: [qfwang@tju.edu.cn](mailto:qfwang@tju.edu.cn)(Q. Wang)

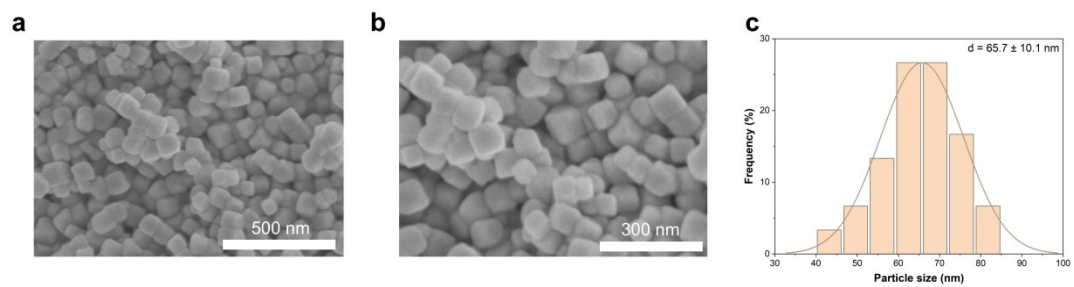

**Figure S1.** SEM image (a) and enlarged SEM image (b) of Cu<sub>2</sub>O. (c) Particle size distribution histogram of Cu<sub>2</sub>O determined from the SEM images.

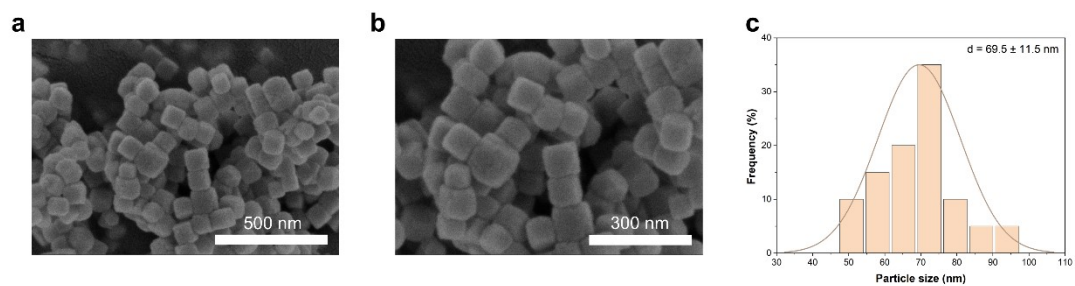

**Figure S2.** SEM image (a) and enlarged SEM image (b) of Sn-Cu<sub>2</sub>O-0.0125. (c) Particle size distribution histogram of Sn-Cu<sub>2</sub>O-0.0125 determined from the SEM images.

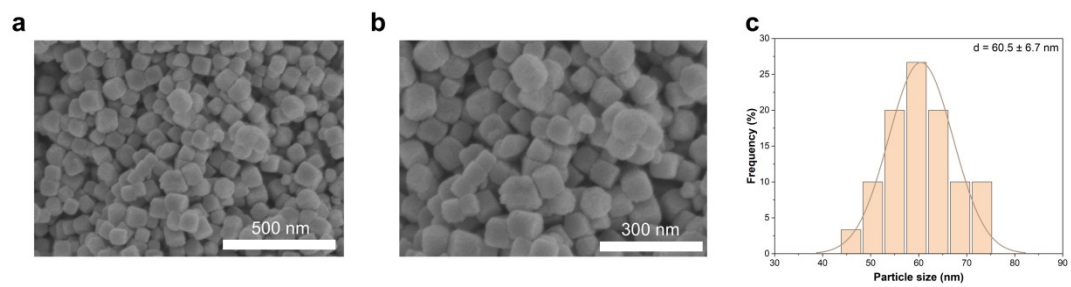

**Figure S3.** SEM image (a) and enlarged SEM image (b) of Sn-Cu<sub>2</sub>O-0.025. (c) Particle size distribution histogram of Sn-Cu<sub>2</sub>O-0.025 determined from the SEM images.

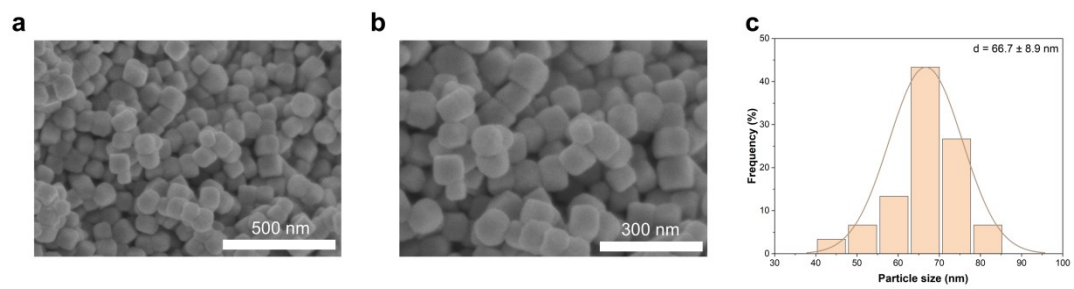

**Figure S4.** SEM image (a) and enlarged SEM image (b) of Sn-Cu<sub>2</sub>O-0.05. (c) Particle size distribution histogram of Sn-Cu<sub>2</sub>O-0.05 determined from the SEM images.

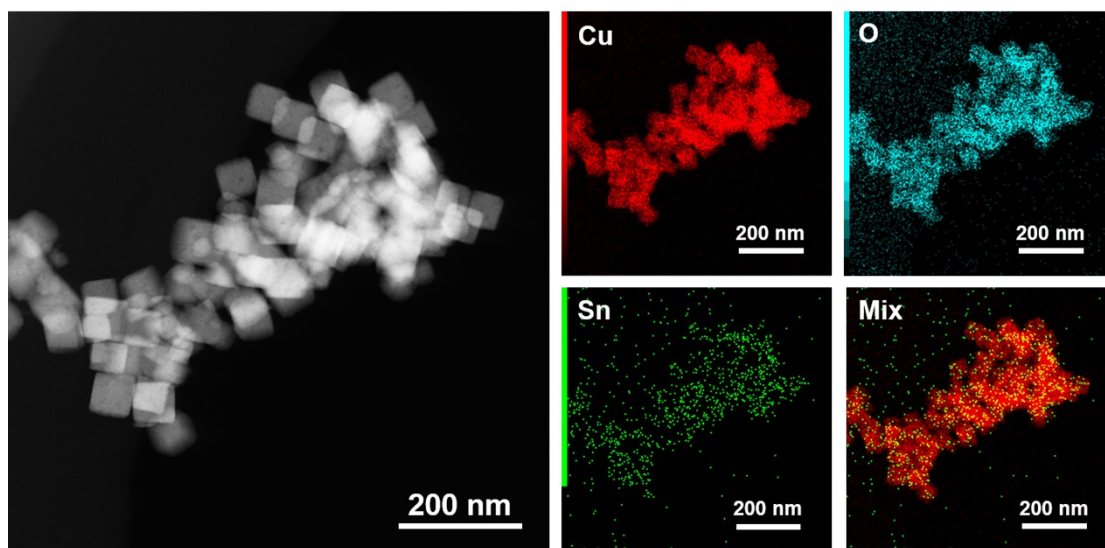

**Figure S5.** TEM image and Element mapping of Cu, O, Sn in Sn-Cu<sub>2</sub>O-0.025.

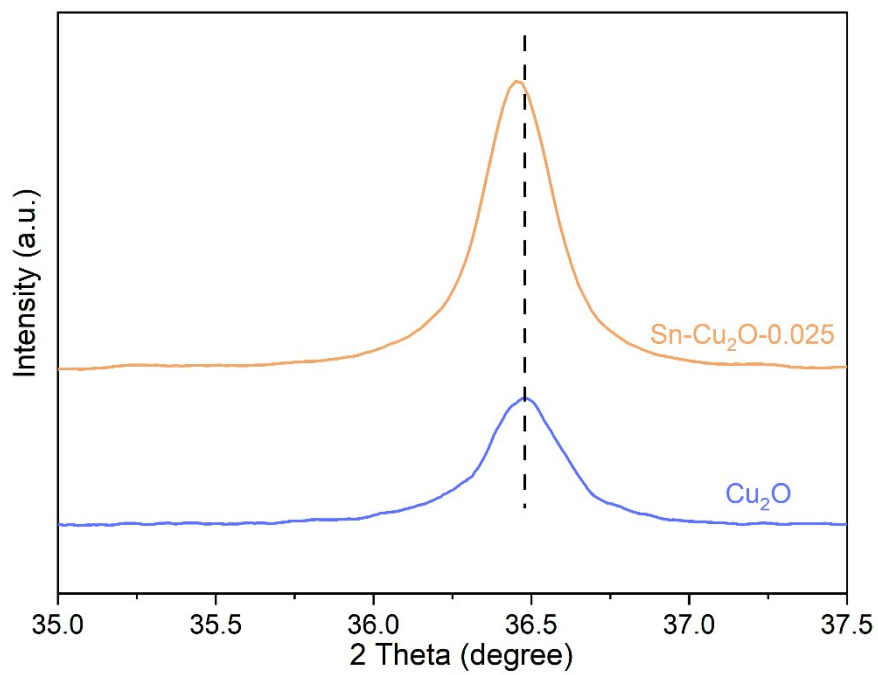

**Figure S6.** XRD magnified patterns of Cu<sub>2</sub>O and Sn-Cu<sub>2</sub>O-0.025.

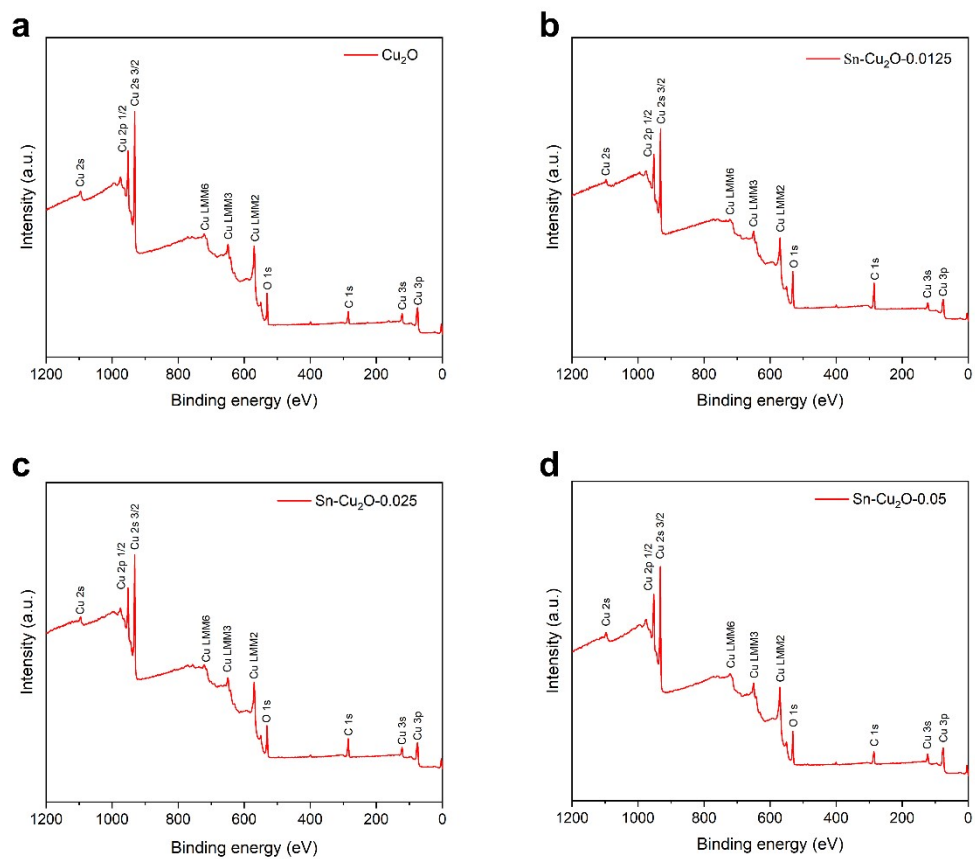

**Figure S7.** XPS survey spectra of Cu<sub>2</sub>O and Sn-Cu<sub>2</sub>O-X (X=0.0125, 0.025, 0.05).

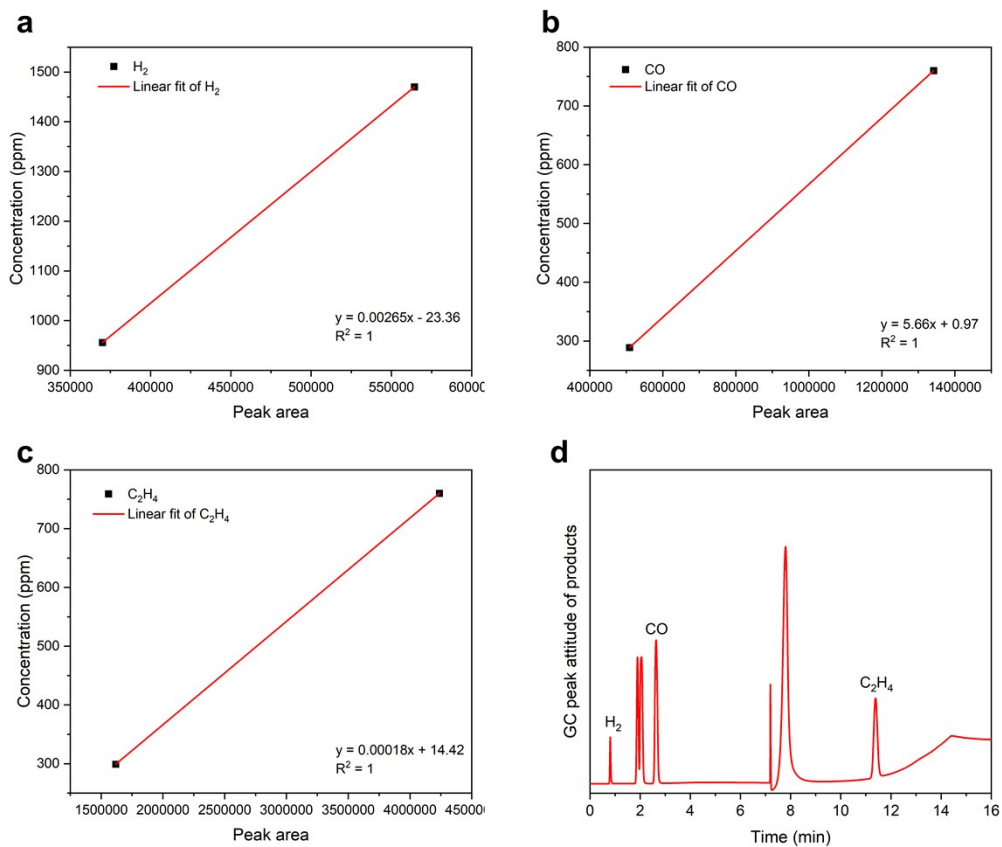

**Figure S8.** The standard curves of (a) H<sub>2</sub>, (b) CO and (c) C<sub>2</sub>H<sub>4</sub>. Typical gas chromatography spectra (d) of the H<sub>2</sub>, CO and C<sub>2</sub>H<sub>4</sub> products of Sn-Cu<sub>2</sub>O-0.025 catalysts.

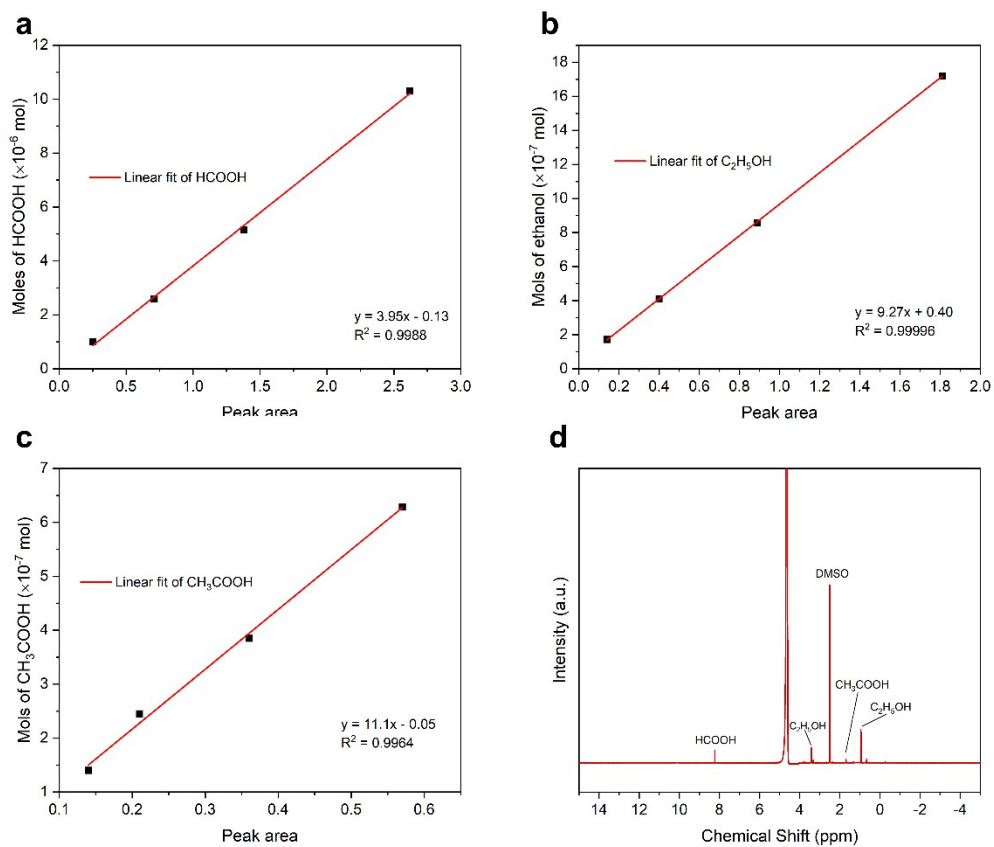

**Figure S9.** The standard curves of (a) HCOOH, (b)  $C_2H_5OH$ , and (c)  $CH_3COOH$ . The representative  $^1H$  NMR spectra (d) of  $CO_2RR$  liquid products of Sn-Cu<sub>2</sub>O-0.05 at 400 mA cm<sup>-2</sup>.

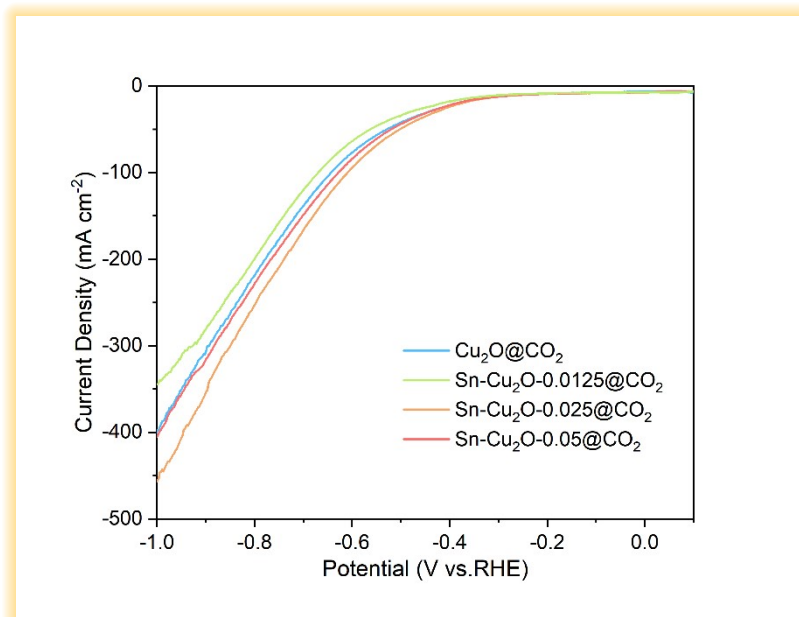

**Figure S10.** LSV curves of Cu<sub>2</sub>O and Sn-Cu<sub>2</sub>O-X measured in CO<sub>2</sub>-saturated 1M KOH.

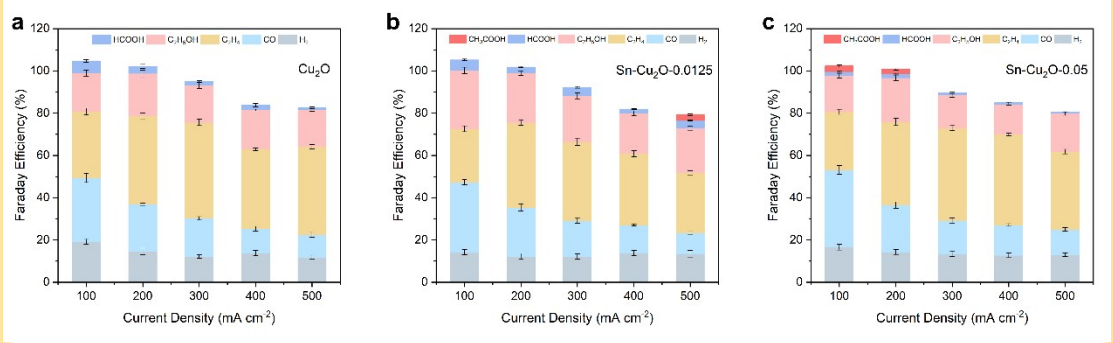

**Figure S11.** FE of  $\text{Cu}_2\text{O}$ ,  $\text{Sn-Cu}_2\text{O-0.0125}$  and  $\text{Sn-Cu}_2\text{O-0.05}$  at applied current density ranging from 100-500  $\text{mA cm}^{-2}$  in 1M KOH.

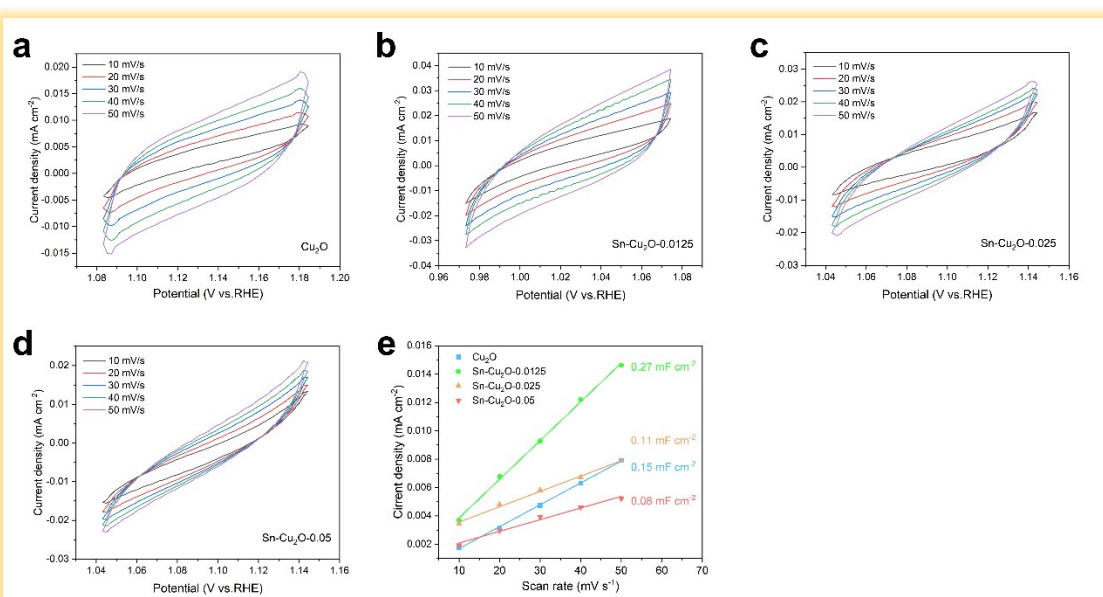

**Figure S12.** Cyclic voltammetry curves for (a) Cu<sub>2</sub>O, (b) Sn-Cu<sub>2</sub>O-0.0125, (c) Sn-Cu<sub>2</sub>O-0.025 and (d) Sn-Cu<sub>2</sub>O-0.05 performed at scan rates from 10 to 50 mV s<sup>-1</sup>. (e) Linear fitting of double-layer capacitance of Cu<sub>2</sub>O and Sn-Cu<sub>2</sub>O-X to estimate ECSA.

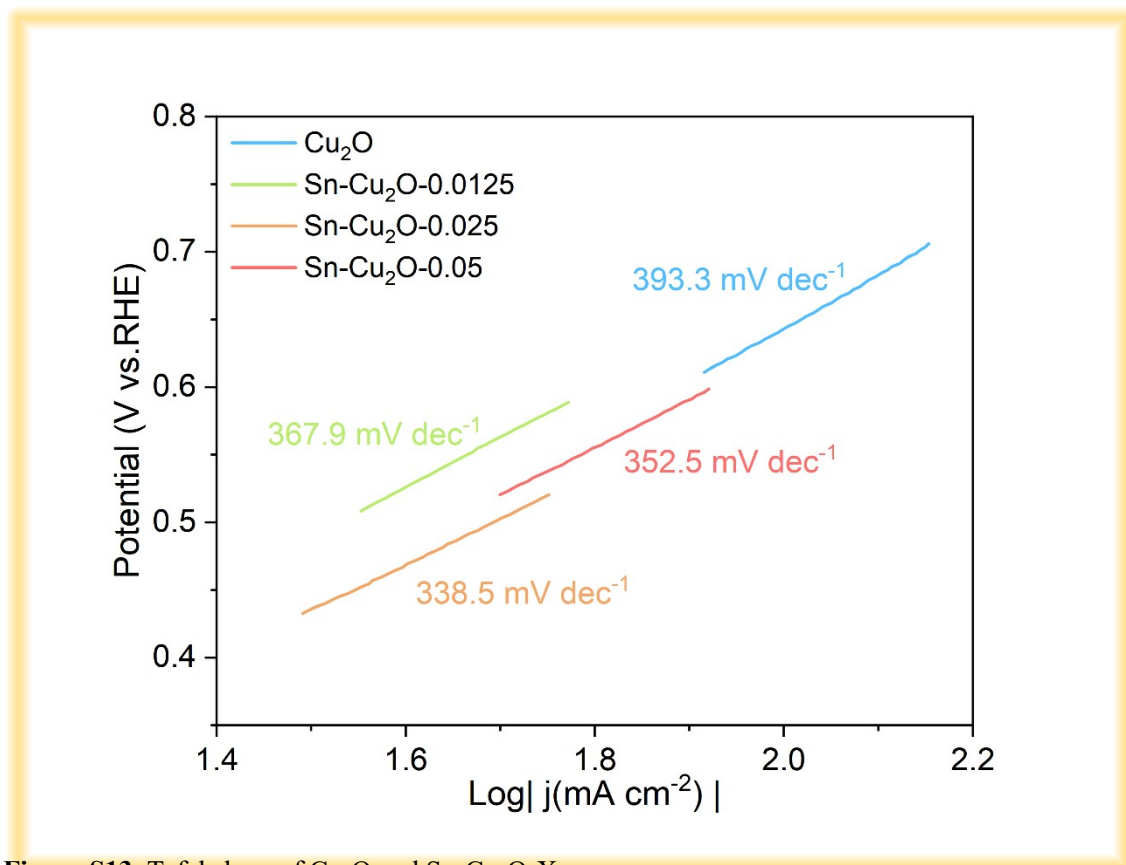

**Figure S13.** Tafel slope of Cu<sub>2</sub>O and Sn-Cu<sub>2</sub>O-X.

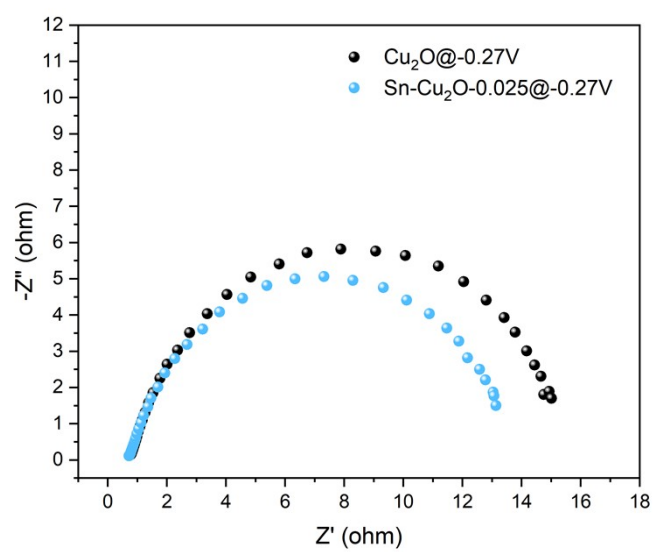

**Figure S14.** EIS curves of  $\text{Cu}_2\text{O}$  and  $\text{Sn-Cu}_2\text{O-0.025}$  catalysts measured at -0.27 V vs RHE.

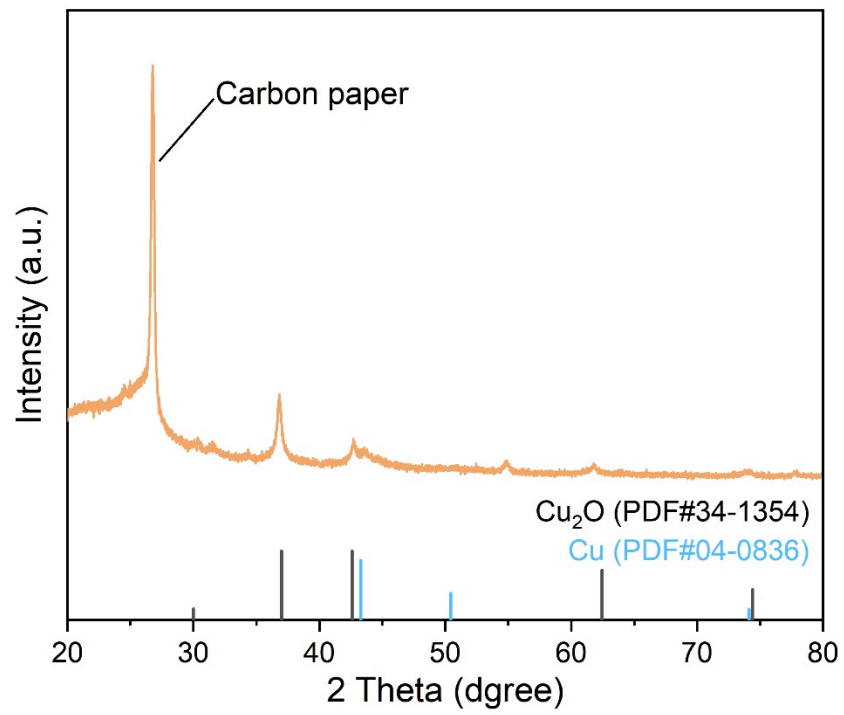

**Figure S15.** XRD image of Sn-Cu<sub>2</sub>O-0.025 catalyst after CO<sub>2</sub>RR test.

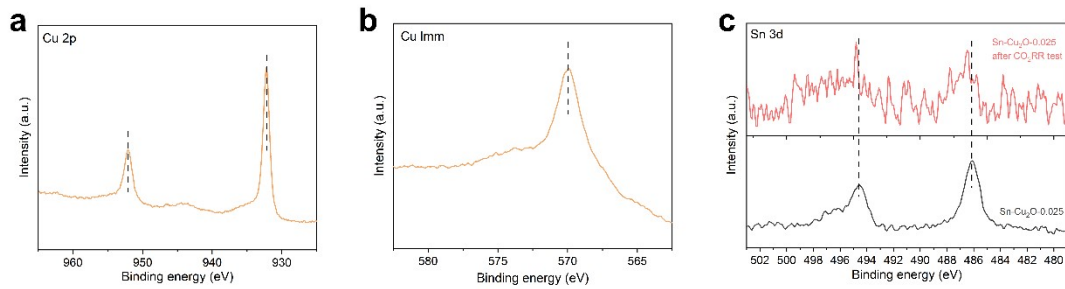

**Figure S16.** The XPS spectra of (a) Cu 2p, (b) Cu 1mm and (c) Sn 3d of Sn-Cu<sub>2</sub>O-0.025 after CO<sub>2</sub>RR test.

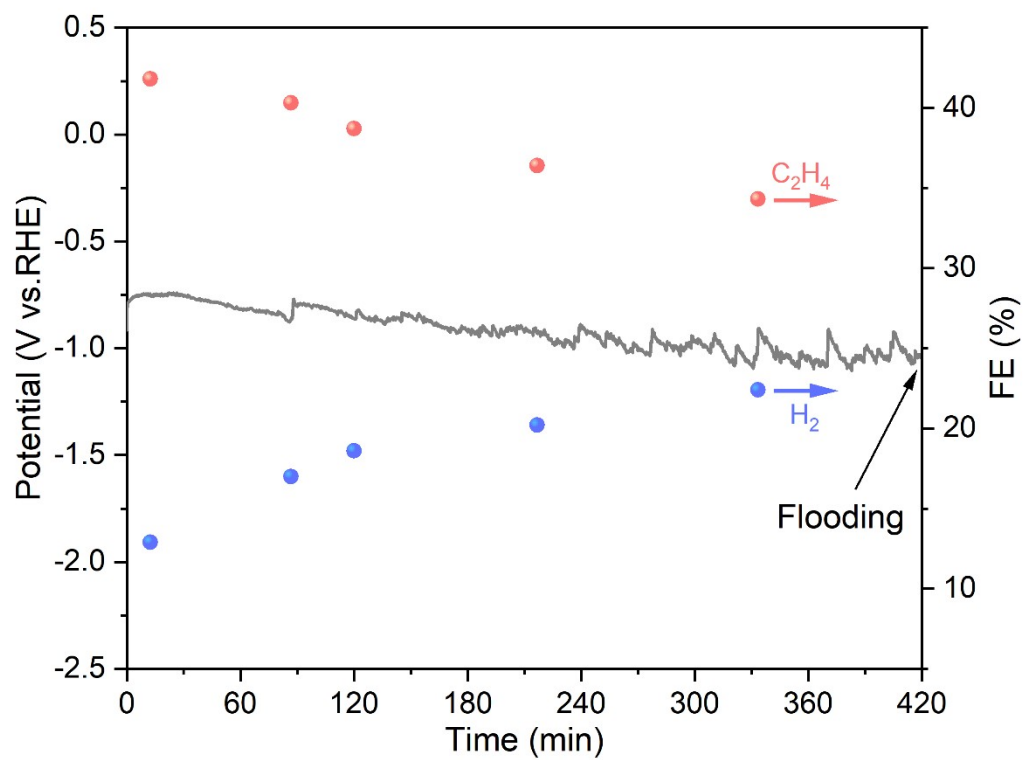

**Figure S17.** Stability of Sn-Cu<sub>2</sub>O-0.025 at 200 mA cm<sup>-2</sup> over 420 min. Products were sampled by GC during the stability experiment.

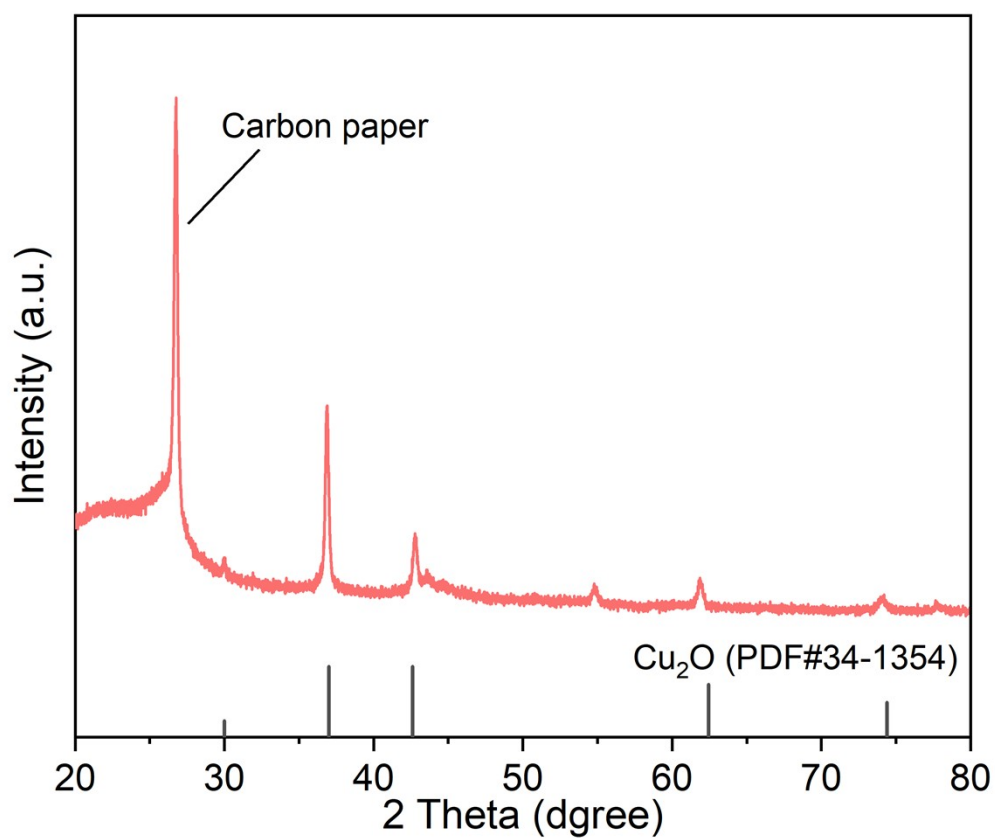

**Figure S18.** The XRD pattern of Sn- $\text{Cu}_2\text{O}$ -0.025 after stability test.

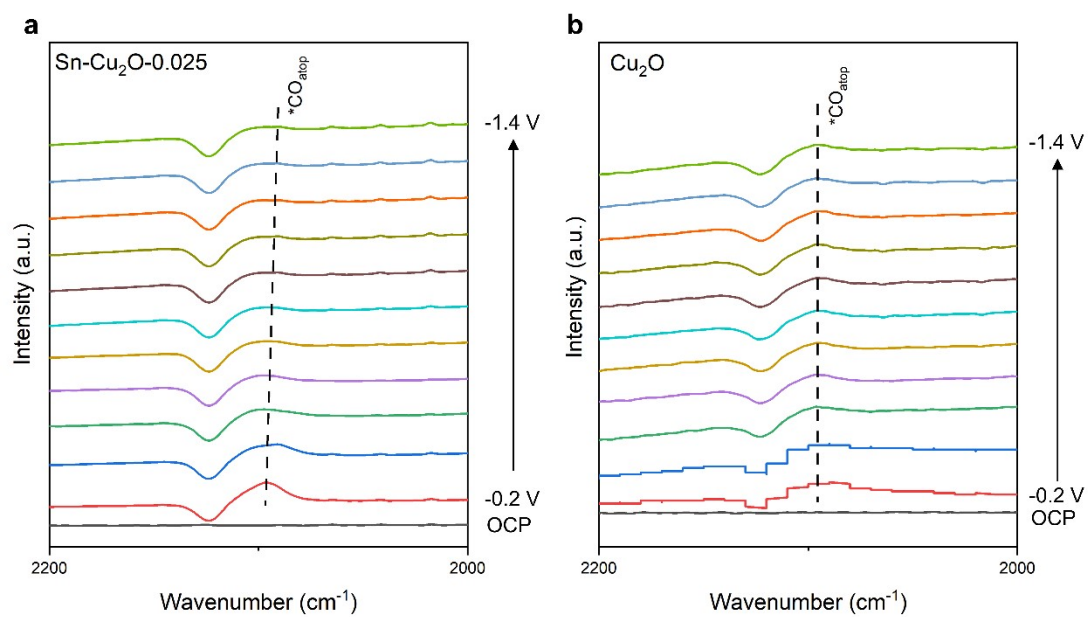

**Figure S19.** In situ IF-TR spectra at different potentials of a) Sn-Cu<sub>2</sub>O-0.025 and b) Cu<sub>2</sub>O.

**TableS1.** The content of metal for Sn-Cu<sub>2</sub>O-0.025, Sn-Cu<sub>2</sub>O-0.05 and Sn-Cu<sub>2</sub>O-0.1 by ICP-OES.

| Sample                      | Metal | Content (wt%) |
|-----------------------------|-------|---------------|
| Sn-Cu <sub>2</sub> O-0.0125 | Sn    | 0.047         |
| Sn-Cu <sub>2</sub> O-0.025  | Sn    | 0.058         |
| Sn-Cu <sub>2</sub> O-0.05   | Sn    | 0.129         |

**TableS2.** The average size and standard deviation of Cu<sub>2</sub>O, Sn-Cu<sub>2</sub>O-0.025, Sn-Cu<sub>2</sub>O-0.05, and Sn-

Cu<sub>2</sub>O-0.1 by SEM images.

| Sample                      | Average (nm) | Standard deviation (nm) |
|-----------------------------|--------------|-------------------------|
| Cu <sub>2</sub> O           | 65.7         | 10.1                    |
| Sn-Cu <sub>2</sub> O-0.0125 | 64.8         | 10.2                    |
| Sn-Cu <sub>2</sub> O-0.025  | 60.5         | 6.7                     |
| Sn-Cu <sub>2</sub> O-0.05   | 66.7         | 8.9                     |

**TableS3.** Performances and comparison of Sn-Cu<sub>2</sub>O-0.025 and reported Cu-based SAA catalysts

for CO<sub>2</sub>RR.

| Catalyst                              | Cell      | Electrolyte            | FE <sub>C2+</sub> (%) | Current Density<br>(mA cm <sup>-2</sup> ) | Ref               |
|---------------------------------------|-----------|------------------------|-----------------------|-------------------------------------------|-------------------|
| Sn-Cu <sub>2</sub> O-0.025            | Flow cell | 1M KOH                 | 73.2                  | 200                                       | This work         |
| Sn1Cu-SAA                             | Flow cell | 1M KOH                 | 79.3                  | 800                                       | ( <sup>1</sup> )  |
| Mo1Cu-SAA                             | Flow cell | 1M KOH                 | 86.4                  | 800                                       | ( <sup>2</sup> )  |
| Pd-Cu                                 | Flow cell | 1M KOH                 | 80.8                  | 800                                       | ( <sup>3</sup> )  |
| Cu3Al-LDHs                            | Flow cell | 1M KOH                 | 84.5                  | 300                                       | ( <sup>4</sup> )  |
| Sc <sub>0.09</sub> -Cu <sub>2</sub> O | Flow cell | 1M KOH                 | 71.9                  | 600                                       | ( <sup>5</sup> )  |
| BiCu-SAA                              | Flow cell | 1M KOH                 | 73.4                  | 400                                       | ( <sup>6</sup> )  |
| CoCu-SAA                              | Flow cell | 1M KHCO <sub>3</sub>   | 61.87                 | ≈520                                      | ( <sup>7</sup> )  |
| AgCu SAA                              | Flow cell | 1M KOH                 | 94                    | 720                                       | ( <sup>8</sup> )  |
| CuPd SAA                              | H-cell    | 0.1M KHCO <sub>3</sub> | 85.7                  | No                                        | ( <sup>9</sup> )  |
| De-Au <sub>1</sub> Cu<br>SAA          | Flow cell | 1M KOH                 | 52                    | 252                                       | ( <sup>10</sup> ) |

## References

- 1 Y. Liu, Z. Yue, C. Jin, L. Zheng, J. Shi, D. Li, Y. Wang, J. Bai, K. Leng, W. Wang, Y. Qu and Q. Li, *Small*, 2025, **21**, 2409259.
- 2 C. Jin, Y. Lin, Y. Wang, J. Shi, R. Li, Y. Liu, Z. Yue, K. Leng, Y. Zhao, Y. Wang, X. Han, Y. Qu and J. Bai, *Advanced Materials*, 2025, **37**, 2412658.
- 3 D. Zhou, C. Chen, Y. Zhang, M. Wang, S. Han, X. Dong, T. Yao, S. Jia, M. He, H. Wu and B. Han, *Angewandte Chemie International Edition*, 2024, **63**, e202400439.
- 4 X. Wang, Q. Zhao, S. Zhao, A. Pang, L. Yang, Y. Sun, Y. Wang and Y. Chen, *J. Mater. Chem. A*, 2025, **13**, 3359–3367.
- 5 R. Chen, Y. Jiang, Y. Zhu, L. Zhang, Y. Li and C. Li, *Advanced Functional Materials*, 2025, **35**, 2415940.
- 6 Y. Cao, S. Chen, S. Bo, W. Fan, J. Li, C. Jia, Z. Zhou, Q. Liu, L. Zheng and F. Zhang, *Angewandte Chemie*, 2023, **135**, e202303048.
- 7 B. Kim, Y. C. Tan, Y. Ryu, K. Jang, H. G. Abbas, T. Kang, H. Choi, K.-S. Lee, S. Park, W. Kim, P.-P. Choi, S. Ringe and J. Oh, *ACS Energy Lett.*, 2023, **8**, 3356–3364.
- 8 C. Du, J. P. Mills, A. G. Yohannes, W. Wei, L. Wang, S. Lu, J.-X. Lian, M. Wang, T. Guo, X. Wang, H. Zhou, C.-J. Sun, J. Z. Wen, B. Kendall, M. Couillard, H. Guo, Z. Tan, S. Siahrostami and Y. A. Wu, *Nat Commun*, 2023, **14**, 6142.
- 9 Z.-Y. Zhang, H.-B. Wang, F.-F. Zhang, J.-W. Li, X.-Z. Hu, S.-W. Yan, Y.-M. Bai, X. Zhang, G.-R. Shen, P.-F. Yin, J. Yang, C.-K. Dong, J. Mao, H. Liu and X.-W. Du, *Rare Met.*, 2024, **43**, 1513–1523.
- 10 Y. Zhao, Y. Wang, Z. Yu, C. Song, J. Wang, H. Huang, L. Meng, M. Liu and L. Liu, *ACS Nano*, 2025, **19**, 4505–4514.
